# Supplementary material
Source: ML conference proceedings conference paper supplement (https://proceedings.neurips.cc/paper_files/paper/2022/hash/fcdffb372c9fa2ce757cf457415c7aab-Abstract.html)
Supplement: Supplementary file 1 [file fcdffb372c9fa2ce757cf457415c7aab-Supplemental-Conference.zip]

Archive with 2 entries (2 files):
- supp.pdf
- __MACOSX/._supp.pdf
